# Supplementary material
Source: MDPI journal article supplement (https://www.mdpi.com/2073-445X/12/3/715)
Supplement: s1 [file s1]

**Supplementary material** to the article " Soil-to-Atmosphere GHG Fluxes in Hemiboreal Deciduous Tree and Willow Coppice Based Agroforestry Systems with Mineral Soil".

**Authors:** Andis Bārdulis\*, Dana Purviņa, Kristaps Makovskis, Arta Bārdule, Dagnija Lazdiņa

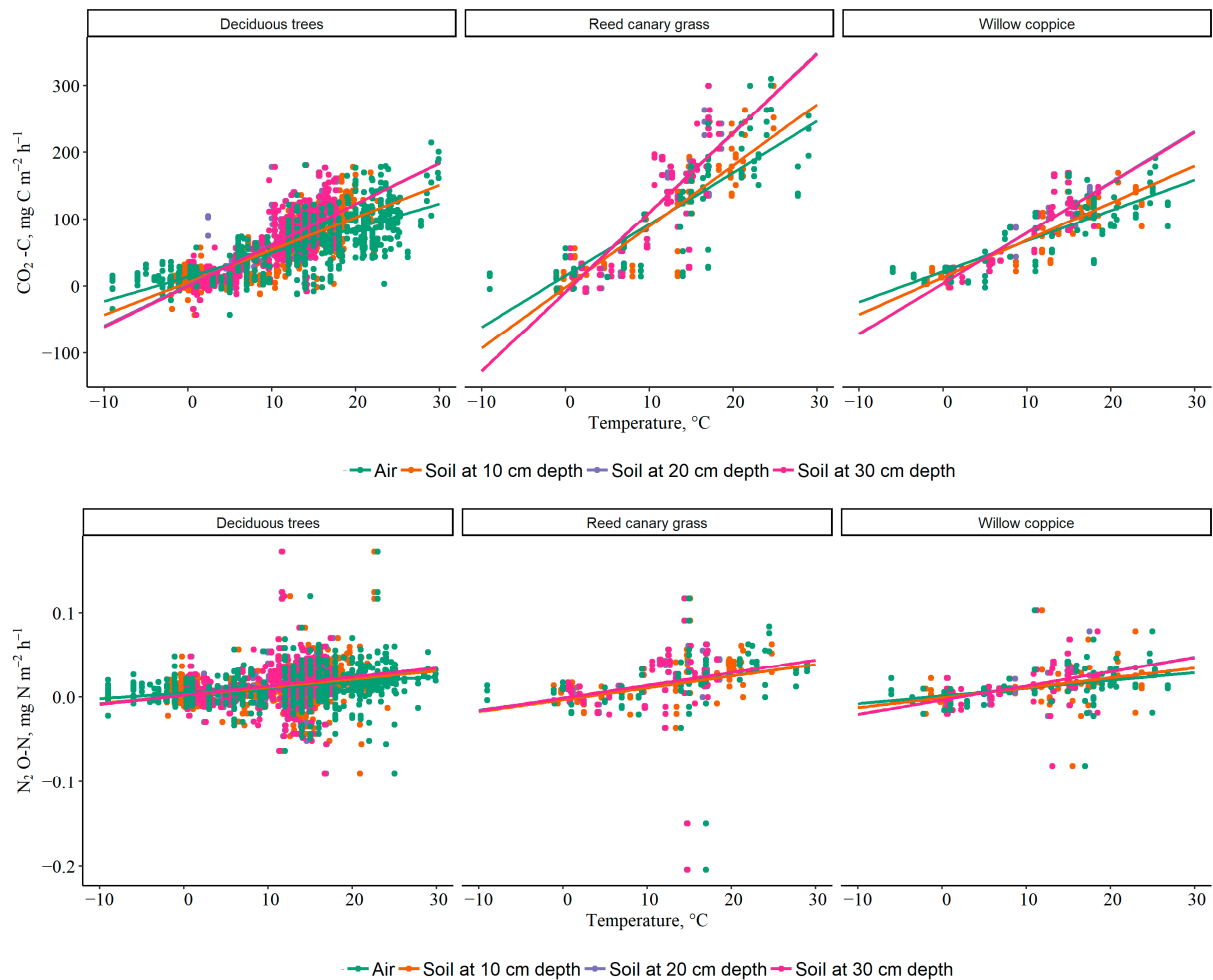

**Figure S1.** Relationships between soil  $\text{CO}_2$  and  $\text{N}_2\text{O}$  fluxes and soil and air temperature, grouped by dominant vegetation type (deciduous trees, willow coppice or RCG) in plots of agroforestry systems.
